# Supplementary material
Source: publisher site journal article supplement (https://www.dovepress.com/article/381604)
Supplement: Supplementary file 1 [file get_supplementary_file.php]

**Supplementary Figure 1 The flow diagram of this study**

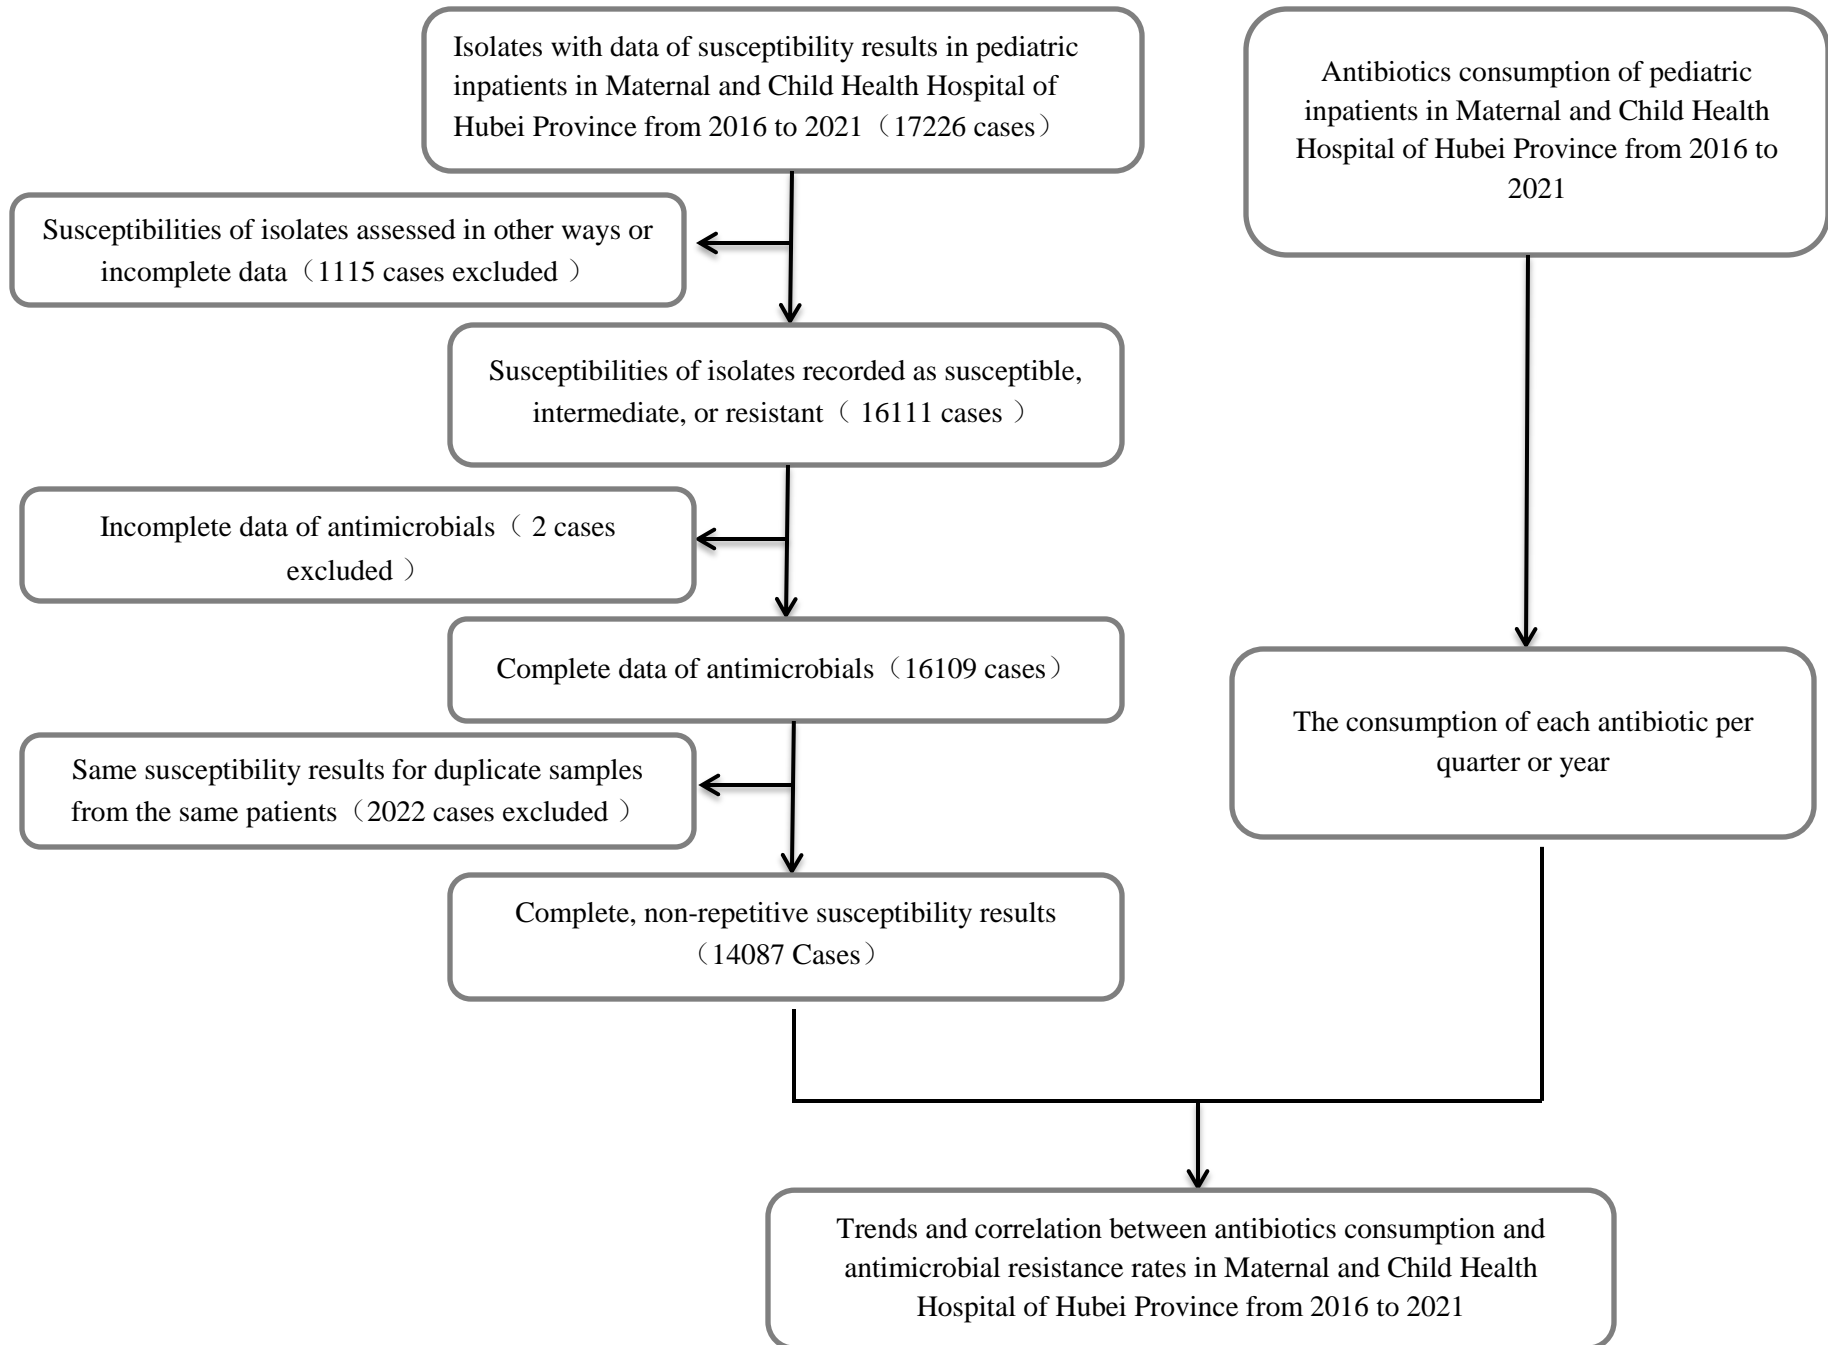

**Supplementary Figure 2 Frequency of the isolated species in the Specialist Children's Hospital during 2016–2021**

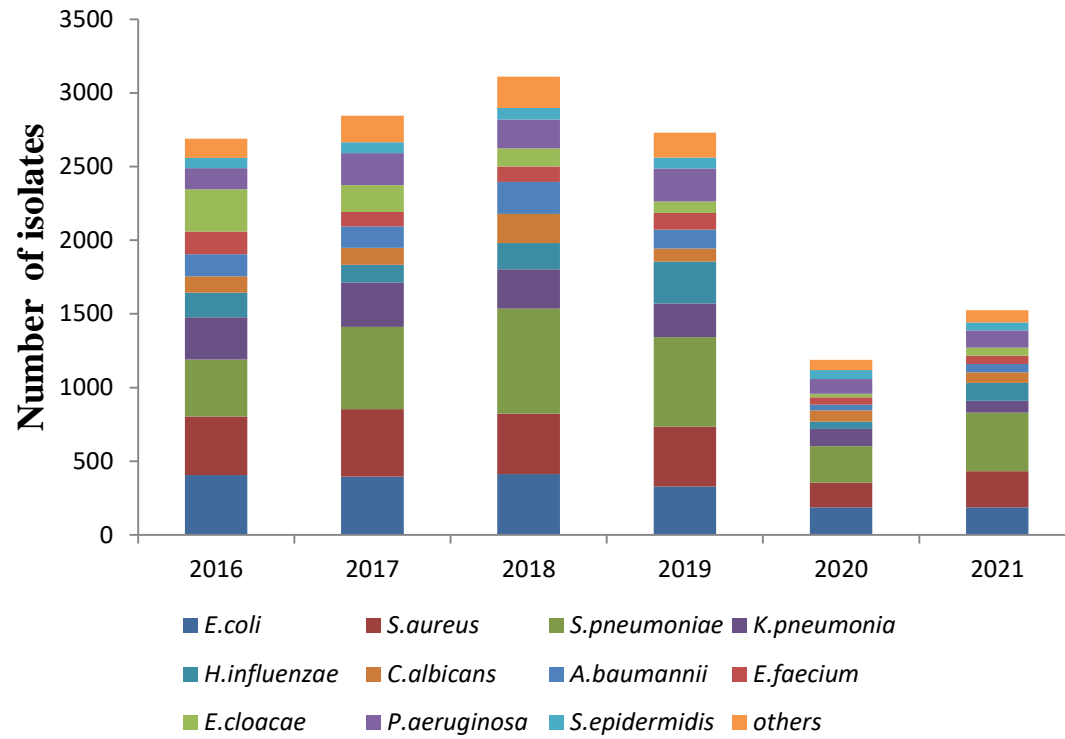

**Supplementary Table 1 Selected general characteristics of patients from 2016 to 2021**

| Selected general characteristics of patients                                                                      | 2016         | 2017            | 2018         | 2019         | 2020        | 2021        |
|-------------------------------------------------------------------------------------------------------------------|--------------|-----------------|--------------|--------------|-------------|-------------|
| Number of inpatients treated with antibiotics                                                                     | 19088        | 19641           | 20194        | 21016        | 12843       | 14676       |
| Sex (male/ female)                                                                                                | 11242/7846   | 11471/8170      | 12318/7876   | 12798/8218   | 7628/5215   | 8823/5853   |
| Age(years, Mean± standard deviation)                                                                              | 2.10±2.44    | 2.19±2.47       | 2.19±2.51    | 2.35±2.63    | 2.18±2.84   | 2.73±2.82   |
| Respiratory system infection [No. (%)]                                                                            | 11697(61.28) | 12558(63.94)    | 11836(58.61) | 12813(60.97) | 6893(53.67) | 8753(59.64) |
| Bloodstream infection [No. (%)]                                                                                   | 2995(15.69)  | 2216(11.28)     | 3088(15.29)  | 2367(11.27)  | 2028(15.79) | 1832(12.48) |
| Digestive system infection [No. (%)]                                                                              | 1580(8.28)   | 1430(7.28)      | 1755(8.69)   | 1501(7.14)   | 1062(8.27)  | 1023(6.97)  |
| Urinary system infection [No. (%)]                                                                                | 1073(5.62)   | 1023.2961(5.21) | 925 (4.58)   | 1112(5.29)   | 814(6.34)   | 788(5.37)   |
| Central nervous system infection [No. (%)]                                                                        | 613(3.21)    | 453.7071(2.31)  | 765(3.79)    | 1465(6.97)   | 904(7.04)   | 768(5.23)   |
| Other (including infection of circulatory system, skin, soft tissue, catheter, and unknown origin etc.) [No. (%)] | 1130(5.92)   | 1960.1718(9.98) | 1826(9.04)   | 1757(8.36)   | 1142(8.8)   | 1513(10.31) |

**Supplementary Table 2 Annual consumption of each antibiotic in the Specialist Children's Hospital during 2016-2021**

| Categories of antibiotics                         | Annual antibiotics consumption<br>(DDDs/1000 patient-days) |       |       |       |       |       |
|---------------------------------------------------|------------------------------------------------------------|-------|-------|-------|-------|-------|
|                                                   | 2016                                                       | 2017  | 2018  | 2019  | 2020  | 2021  |
| Penicillins<br>(except for P/BLI combinations)    | 19.98                                                      | 24.77 | 17.11 | 21.51 | 48.96 | 42.81 |
| JO1JB06                                           | 1.93                                                       | 3.94  | 2.38  | 1.65  | 9.68  | 9.02  |
| J01CE01                                           | 0.57                                                       | 1.10  | 0.08  | 0.03  | 5.74  | 8.00  |
| J01CA01                                           | 2.13                                                       | 2.51  | 3.03  | 4.35  | 7.88  | 12.45 |
| J01CA04                                           | 0.36                                                       | 0.07  | 0.02  | 0.00  | 0.06  | 0.07  |
| J01CF04                                           | 1.44                                                       | 2.17  | 0.13  | 0.06  | 1.11  | 0.83  |
| J01CF05                                           | 12.13                                                      | 11.97 | 11.43 | 15.38 | 22.48 | 12.44 |
| J01CA16                                           | 1.42                                                       | 3.01  | 0.03  | 0.04  | 2.00  | 0.00  |
| P/BLI combinations                                | 1.11                                                       | 0.29  | 0.67  | 0.65  | 0.79  | 2.37  |
| J01CR02                                           | 0.53                                                       | 0.01  | 0.35  | 0.37  | 0.21  | 0.25  |
| J01CR05                                           | 0.58                                                       | 0.28  | 0.32  | 0.28  | 0.58  | 2.12  |
| First-generation cephalosporins                   | 1.19                                                       | 0.82  | 0.73  | 1.37  | 1.39  | 3.41  |
| J01DB12                                           | 0.61                                                       | 0.54  | 0.50  | 1.04  | 0.67  | 3.41  |
| J01DB06                                           | 0.58                                                       | 0.28  | 0.23  | 0.33  | 0.72  | 0.00  |
| Second-generation cephalosporins                  | 3.04                                                       | 2.48  | 4.1   | 1.78  | 2.15  | 3.48  |
| J01DC04                                           | 0.01                                                       | 0.01  | 0.04  | 0.03  | 0.57  | 0.33  |
| J01DC07                                           | 0.07                                                       | 0.02  | 0.01  | 0.33  | 0.18  | 0.00  |
| J01DC05                                           | 1.74                                                       | 1.75  | 3.45  | 1.10  | 0.84  | 0.33  |
| J01DC01                                           | 0.02                                                       | 0.00  | 0.00  | 0.00  | 0.00  | 0.00  |
| J01DC09                                           | 1.20                                                       | 0.70  | 0.59  | 0.33  | 0.56  | 2.82  |
| Third-generation cephalosporins                   | 4.24                                                       | 5.31  | 6.81  | 7.27  | 5.99  | 18.99 |
| J01DD15                                           | 0.02                                                       | 0.07  | 0.01  | 0.02  | 0.07  | 0.07  |
| J01DD08                                           | 0.14                                                       | 0.08  | 0.33  | 0.26  | 0.19  | 0.14  |
| J01DD13                                           | 0.07                                                       | 0.00  | 0.00  | 0.00  | 0.00  | 0.00  |
| J01DD04                                           | 3.00                                                       | 2.52  | 3.97  | 3.18  | 1.60  | 11.33 |
| J01DD01                                           | 0.00                                                       | 0.00  | 0.00  | 0.00  | 0.00  | 0.00  |
| J01DD02                                           | 0.29                                                       | 0.82  | 0.26  | 0.27  | 1.25  | 7.45  |
| J01DD07                                           | 0.72                                                       | 1.82  | 2.23  | 3.54  | 2.87  | 0.00  |
| Fourth-generation cephalosporins                  | 0.01                                                       | 0     | 0     | 0.03  | 0     | 0     |
| J01DE01                                           | 0.01                                                       | 0.00  | 0.00  | 0.03  | 0.00  | 0.00  |
| Cephalosporins<br>(except for C/BLI combinations) | 8.47                                                       | 8.61  | 11.64 | 10.45 | 9.53  | 25.88 |

|                             |       |       |       |       |        |        |
|-----------------------------|-------|-------|-------|-------|--------|--------|
| C/BLI combinations          | 55.79 | 58.04 | 64.42 | 62.18 | 99.58  | 209.11 |
| J01DD62                     | 32.51 | 38.08 | 37.65 | 33.58 | 58.28  | 103.71 |
| J01DD63                     | 5.66  | 2.15  | 3.14  | 2.68  | 6.50   | 42.60  |
| J01DD51                     | 17.62 | 17.82 | 23.63 | 25.91 | 34.80  | 62.81  |
| BL/BLI combinations         | 56.9  | 58.33 | 65.09 | 62.83 | 100.37 | 211.48 |
| Carbapenems                 | 7.82  | 6.41  | 6.99  | 7.57  | 12.32  | 17.25  |
| J01DH02                     | 6.67  | 5.36  | 5.54  | 4.98  | 8.46   | 13.67  |
| J01DH51                     | 1.15  | 1.05  | 1.45  | 2.59  | 3.86   | 3.58   |
| Monobactams                 | 1.82  | 2.61  | 2.81  | 2.86  | 3.41   | 7.16   |
| J01DF01                     | 1.82  | 2.61  | 2.81  | 2.86  | 3.41   | 7.16   |
| Macrolides                  | 95.12 | 77.54 | 74.05 | 73.56 | 41.4   | 66.32  |
| J01FA01                     | 76.15 | 61.85 | 59.97 | 58.11 | 32.70  | 37.76  |
| J01FA10                     | 18.97 | 15.68 | 14.08 | 15.44 | 8.70   | 28.57  |
| Glycopeptide antibacterials | 1.72  | 1.48  | 1.11  | 0.94  | 2.98   | 4.2    |
| J01XA01                     | 1.68  | 1.46  | 1.11  | 0.94  | 2.98   | 4.20   |
| J01XA02                     | 0.04  | 0.02  | 0.01  | 0.00  | 0.00   | 0.00   |
| Oxazolidinone               | 7.87  | 4.94  | 2.44  | 4.96  | 3.13   | 2.57   |
| J01XX08                     | 7.87  | 4.94  | 2.44  | 4.96  | 3.13   | 2.57   |
| Imidazole derivatives       | 2.34  | 3.39  | 4.13  | 3.26  | 2.21   | 3.45   |
| J01XD02                     | 0.00  | 0.01  | 0.00  | 0.00  | 0.00   | 0.00   |
| J01XD03                     | 0.07  | 0.25  | 0.42  | 0.10  | 0.00   | 0.00   |
| J01XD01                     | 2.27  | 3.13  | 3.71  | 3.16  | 2.21   | 3.45   |
| Quinolones                  | 0.03  | 0.21  | 0.26  | 0.25  | 0.14   | 0.47   |
| J01MA02                     | 0.01  | 0.16  | 0.06  | 0.11  | 0.01   | 0.05   |
| J01MA14                     | 0.00  | 0.01  | 0.06  | 0.01  | 0.00   | 0.00   |
| J01MA12                     | 0.02  | 0.04  | 0.14  | 0.12  | 0.13   | 0.42   |
| Antifungal drugs            | 5.44  | 18.9  | 5.81  | 5.71  | 4.01   | 6.08   |
| J02AC03                     | 2.20  | 13.73 | 3.43  | 2.39  | 0.24   | 1.41   |
| J02AC01                     | 2.87  | 3.15  | 1.75  | 2.03  | 2.31   | 3.14   |
| J02AX04                     | 0.00  | 0.74  | 0.08  | 0.01  | 0.04   | 0.22   |
| J02AX05                     | 0.38  | 1.27  | 0.55  | 1.28  | 1.41   | 1.32   |
| Sodium fusidate             | 0.63  | 0.3   | 0.13  | 0.2   | 0.24   | 0.27   |
| J01XC01                     | 0.63  | 0.29  | 0.13  | 0.20  | 0.24   | 0.27   |
| Aminoglycosides             | 0.1   | 0     | 0     | 0     | 0.01   | 3.66   |
| J01GB03                     | 0.10  | 0.00  | 0.00  | 0.00  | 0.00   | 3.59   |
| J01GB06                     | 0.00  | 0.00  | 0.00  | 0.00  | 0.01   | 0.06   |
| Nitrofurans derivatives     | 0     | 0     | 0     | 0     | 0      | 0.04   |
| G01AX06                     | 0     | 0     | 0     | 0     | 0      | 0.04   |

|                                                                                 |      |      |      |      |      |      |
|---------------------------------------------------------------------------------|------|------|------|------|------|------|
| Sulfonamides and trimethoprim, Lincosamides,<br>Streptogramins and Tetracycline | 0.00 | 0.00 | 0.00 | 0.00 | 0.00 | 0.00 |
|---------------------------------------------------------------------------------|------|------|------|------|------|------|

Abbreviations: BL/BLI,  $\beta$ -lactam/ $\beta$ -lactamase inhibitor; C/BLI, cephalosporin/ $\beta$ -lactamase inhibitor; P/BLI, penicillin/ $\beta$ -Lactamase inhibitor; DDDs, defined daily doses.

**Supplementary Table 3. Resistance trends of ten frequent isolated species in this Specialist Children's Hospital during 2016–2021**

| isolated species to various antibiotics |                         | Resistant number and rates of isolated species [n (%)] |           |           |           |           |           | Linear regression |          |
|-----------------------------------------|-------------------------|--------------------------------------------------------|-----------|-----------|-----------|-----------|-----------|-------------------|----------|
|                                         |                         | 2016                                                   | 2017      | 2018      | 2019      | 2020      | 2021      | Slope ( $\beta$ ) | <i>P</i> |
| <i>E.coli</i>                           | Ampicillin              | 312(78.0)                                              | 316(80.0) | 342(83.4) | 267(81.4) | 161(87.0) | 153(82.3) | 1.157             | 0.119    |
|                                         | Ampicillin/sulbactam    | 192(47.9)                                              | 184(46.7) | 215(52.2) | 188(57.5) | 118(64.1) | 87(46.3)  | 1.414             | 0.468    |
|                                         | Piperacillin/tazobactam | 7(1.7)                                                 | 4(1.0)    | 4(1.0)    | 4(1.3)    | 0(0.0)    | 4(2.1)    | -0.20             | 0.922    |
|                                         | Ceftazidime             | 57(14.0)                                               | 51(12.9)  | 48(11.6)  | 50(15.2)  | 25(13.6)  | 15(8.0)   | --0.694           | 0.297    |
|                                         | Ceftriaxone             | 184(45.3)                                              | 159(40.4) | 192(46.5) | 137(41.8) | 88(47.1)  | 63(33.5)  | -1.246            | 0.364    |
|                                         | Cefepime                | 28(7.0)                                                | 33(8.4)   | 39(9.5)   | 35(10.7)  | 16(8.9)   | 25(13.3)  | 0.977             | 0.036    |
|                                         | Cefotetan               | 9(2.2)                                                 | 6(1.6)    | 2(0.6)    | 4(1.4)    | 1(0.5)    | 2(1.2)    | -0.214            | 0.181    |
|                                         | Aztreonam               | 86(21.5)                                               | 83(21.0)  | 91(22.0)  | 71(21.6)  | 36(19.8)  | 20(11.1)  | -1.600            | 0.110    |
|                                         | Meropenem               | /                                                      | 0(0.0)    | /         | /         | 0(0.0)    | 0(0.0)    | -                 | -        |
|                                         | Imipenem                | 7(1.8)                                                 | 3(0.8)    | 3(0.7)    | 2(0.6)    | 0(0.0)    | 0(0.0)    | -0.329            | 0.008    |
|                                         | Amikacin                | 5(1.2)                                                 | 4(1.0)    | 2(0.5)    | 4(1.4)    | 0(0.0)    | 0(0.0)    | -0.231            | 0.112    |
|                                         | Gentamicin              | 99(24.8)                                               | 116(29.5) | 114(27.6) | 95(29.2)  | 43(23.6)  | 59(31.7)  | 0.526             | 0.534    |
|                                         | Tobramycin              | 18(4.5)                                                | 18(4.5)   | 24(5.8)   | 14(4.5)   | 4(2.1)    | 0(0.0)    | -0.886            | 0.066    |
| Ciprofloxacin                           | 105(25.9)               | 105(26.7)                                              | 126(30.7) | 100(30.6) | 47(25.5)  | 74(40.2)  | 1.937     | 0.158             |          |

|                     |                               |           |           |           |           |          |          |        |       |
|---------------------|-------------------------------|-----------|-----------|-----------|-----------|----------|----------|--------|-------|
|                     | Levofloxacin                  | 100(24.6) | 98(24.9)  | 119(28.8) | 100(30.5) | 46(25.0) | 58(30.9) | 0.957  | 0.202 |
|                     | Trimethoprim/Sulfamethoxazole | 182(45.0) | 173(43.9) | 177(42.9) | 142(43.8) | 80(43.5) | 95(50.5) | 0.777  | 0.294 |
|                     | Nitrofurantoin                | 18(4.4)   | 9(2.4)    | 2(0.5)    | 7(2.2)    | 6(3.3)   | 0(0.0)   | -0.503 | 0.241 |
|                     | Carbapenems                   | 7(1.8)    | 3(0.8)    | 3(0.7)    | 2(0.6)    | 0(0.0)   | 0(0.0)   | -0.329 | 0.008 |
| <i>H.influenzae</i> | Ampicillin                    | 141(86.5) | 98(81.7)  | 145(82.4) | 236(82.5) | 42(85.7) | 89(88.1) | 0.574  | 0.422 |
|                     | Amoxicillin/clavulanate       | 28(17.3)  | 29(24.8)  | 40(22.2)  | 51(18.0)  | 0(0.0)   | 20(19.8) | -1.889 | 0.429 |
|                     | Cefuroxime                    | 56(33.9)  | 42(35.9)  | 78(43.3)  | 116(41.0) | 7(14.3)  | 27(32.5) | -2.117 | 0.450 |
|                     | Cefotaxime                    | 0(0.0)    | 0(0.0)    | 0(0.0)    | 0(0.0)    | 0(0.0)   | 0(0.0)   | -      | -     |
|                     | Cefaclor                      | 65(49.2)  | 51(42.9)  | 101(57.1) | 157(55.5) | 16(32.0) | 66(61.1) | 0.720  | 0.813 |
|                     | Rifampicin                    | 0(0.0)    | 0(0.0)    | 0(0.0)    | 0(0.0)    | 0(0.0)   | 0(0.0)   | -      | -     |
|                     | Ciprofloxacin                 | 0(0.0)    | 0(0.0)    | 0(0.0)    | 0(0.0)    | 0(0.0)   | 0(0.0)   | -      | -     |
|                     | Ofloxacin                     | 0(0.0)    | 0(0.0)    | 0(0.0)    | 1(0.3)    | 0(0.0)   | 0(0.0)   | 0.009  | 0.805 |
|                     | Chloramphenicol               | 9(5.5)    | 3(2.7)    | 7(3.9)    | 15(5.5)   | 0(0.0)   | 2(1.6)   | -0.743 | 0.178 |
|                     | Tetracycline                  | 11(6.6)   | 3(2.7)    | 7(3.9)    | 15(5.5)   | 4(9.5)   | 2(2.4)   | 0.029  | 0.970 |
| <i>K.pneumonia</i>  | Ampicillin/sulbactam          | 149(52.1) | 170(56.7) | 127(47.9) | 93(41.7)  | 69(59.5) | 19(23.8) | -3.980 | 0.234 |
|                     | Piperacillin/tazobactam       | 59(20.6)  | 95(31.8)  | 33(12.4)  | 16(7.3)   | 27(23.3) | 5(6.5)   | -2.889 | 0.267 |
|                     | Ceftazidime                   | 97(34.0)  | 123(40.9) | 72(27.0)  | 39(17.2)  | 42(36.2) | 13(16.9) | -3.126 | 0.227 |



|                  |                         |           |           |           |          |          |          |        |       |
|------------------|-------------------------|-----------|-----------|-----------|----------|----------|----------|--------|-------|
|                  | Ceftriaxone             | 142(49.8) | 164(54.7) | 121(45.5) | 94(41.8) | 65(56.5) | 18(23.4) | -3.723 | 0.230 |
|                  | Cefepime                | 78(27.4)  | 114(38.0) | 54(20.4)  | 51(22.7) | 39(33.9) | 12(15.6) | -1.971 | 0.388 |
|                  | Cefotetan               | 57(20.1)  | 93(31.1)  | 26(9.9)   | 16(7.0)  | 21(18.1) | 3(4.8)   | -3.383 | 0.171 |
|                  | Aztreonam               | 97(33.9)  | 130(43.5) | 90(33.8)  | 61(26.9) | 52(45.2) | 19(23.8) | -1.494 | 0.529 |
|                  | Meropenem               | 0(0.0)    | /         | 26(9.8)   | /        | 0(0.0)   | /        | -      | -     |
|                  | Ertapenem               | 0(0.0)    | 0(0.0)    | 0(0.0)    | 0(0.0)   | 0(0.0)   | 3(4.0)   | 0.571  | 0.158 |
|                  | Imipenem                | 36(12.8)  | 101(33.7) | 27(10.2)  | 57(25.2) | 20(18.9) | 24(29.6) | 1.560  | 0.547 |
|                  | Meropenem               | 31(10.8)  | 98(32.5)  | 26(9.8)   | 50(22.4) | 17(15.6) | 18(24.3) | 0.840  | 0.734 |
|                  | Amikacin                | 47(16.9)  | 68(22.5)  | 14(5.2)   | 6(2.6)   | 12(10.3) | 5(6.5)   | -2.606 | 0.172 |
|                  | Gentamicin              | 92(32.1)  | 78(25.9)  | 46(17.4)  | 24(10.6) | 13(11.2) | 16(19.8) | -3.211 | 0.110 |
|                  | Tobramycin              | 50(17.4)  | 72(24.1)  | 23(8.8)   | 14(6.2)  | 18(15.7) | 11(14.3) | -1.237 | 0.480 |
|                  | Ciprofloxacin           | 54(18.9)  | 86(28.9)  | 40(15.2)  | 31(13.8) | 28(24.1) | 11(14.3) | -1.109 | 0.511 |
|                  | Carbapenems             | 36(12.8)  | 101(33.7) | 27(10.2)  | 57(25.2) | 20(18.9) | 24(29.6) | 1.560  | 0.547 |
| <i>E.cloacae</i> | Piperacillin/tazobactam | /         | 5(2.7)    | 9(7.7)    | 10(13.9) | 4(18.2)  | 7(13.0)  | -      | -     |
|                  | Ceftazidime             | 29(10.4)  | 29(16.2)  | 30(24.8)  | 21(26.6) | 7(31.8)  | 10(21.7) | 3.003  | 0.097 |
|                  | Ceftriaxone             | 74(26.0)  | 34(18.8)  | 37(30.8)  | 12(15.4) | 5(20.8)  | 7(17.9)  | -1.426 | 0.353 |
|                  | Cefepime                | 17(6.2)   | 9(5.4)    | 13(10.8)  | 28(35.4) | 4(18.2)  | 2(4.2)   | 1.500  | 0.654 |

|                     |                               |          |          |          |          |         |          |        |       |
|---------------------|-------------------------------|----------|----------|----------|----------|---------|----------|--------|-------|
|                     | Aztreonam                     | 50(17.7) | 29(16.2) | 30(25.4) | 7(10.9)  | 8(36.4) | 10(20.4) | 1.703  | 0.487 |
|                     | Meropenem                     | /        | 0(0.0)   | /        | /        | /       | 0(0.0)   | -      | -     |
|                     | Ertapenem                     | 0(0.0)   | 0(0.0)   | 0(0.0)   | 6(8.1)   | 0(0.0)  | 6(11.3)  | 1.846  | 0.141 |
|                     | Imipenem                      | 3(1.0)   | 5(2.7)   | 8(6.9)   | /        | 3(13.6) | 4(8.3)   | -      | -     |
|                     | Amikacin                      | 0(0.0)   | 0(0.0)   | 0(0.0)   | 1(1.3)   | 2(9.1)  | 0(0.0)   | 0.817  | 0.408 |
|                     | Gentamicin                    | 6(2.1)   | 8(4.5)   | 1(0.8)   | 2(2.5)   | 2(9.1)  | 0(0.0)   | 0.143  | 0.878 |
|                     | Ciprofloxacin                 | 3(1.0)   | 0(0.0)   | 1(0.8)   | 2(2.5)   | 0(0.0)  | 0(0.0)   | -0.094 | 0.733 |
|                     | Levofloxacin                  | 3(1.0)   | 0(0.0)   | 0(0.0)   | 1(1.3)   | 0(0.0)  | 0(0.0)   | -0.106 | 0.524 |
|                     | Trimethoprim/Sulfamethoxazole | 23(8.3)  | 15(8.8)  | 14(11.5) | 10(12.7) | 4(18.2) | 7(13.0)  | 1.511  | 0.062 |
|                     | Carbapenems                   | 3(1.0)   | 5(2.7)   | 8(6.9)   | 6(8.1)   | 3(13.6) | 6(11.3)  | 2.440  | 0.005 |
| <i>P.aeruginosa</i> | Piperacillin                  | 12(8.8)  | 20(9.3)  | 4(2.0)   | /        | 0(0.0)  | 0(0.0)   | -      | -     |
|                     | Piperacillin/tazobactam       | 10(7.2)  | 6(2.9)   | 4(2.4)   | 6(2.9)   | 0(0.0)  | 14(12.5) | 0.523  | 0.679 |
|                     | Ceftazidime                   | 6(4.1)   | 4(1.8)   | 4(2.0)   | 14(7.2)  | 7(7.3)  | 10(8.9)  | 1.306  | 0.049 |
|                     | Cefepime                      | 10(7.2)  | 4(2.2)   | 3(1.8)   | 3(1.6)   | 1(1.0)  | 1(0.9)   | -1.009 | 0.060 |
|                     | Imipenem                      | 8(6.0)   | 53(24.8) | 4(2.5)   | 25(11.2) | 7(7.1)  | 18(15.9) | 0.146  | 0.949 |
|                     | Meropenem                     | 12(8.5)  | 24(11.1) | 4(2.0)   | 23(10.6) | 5(5.6)  | 16(14.3) | 0.603  | 0.621 |
|                     | Amikacin                      | 9(6.2)   | 3(1.5)   | 0(0.0)   | 0(0.0)   | 0(0.0)  | 2(1.8)   | -0.757 | 0.218 |

|                     |                               |          |          |           |          |          |          |        |       |
|---------------------|-------------------------------|----------|----------|-----------|----------|----------|----------|--------|-------|
|                     | Gentamicin                    | 9(6.2)   | 0(0.0)   | 4(2.4)    | 1(0.4)   | 1(1.0)   | 0(0.0)   | -0.857 | 0.146 |
|                     | Tobramycin                    | 9(6.2)   | 0(0.0)   | 3(1.8)    | 0(0.0)   | 1(1.0)   | 1(0.9)   | -0.723 | 0.227 |
|                     | Ciprofloxacin                 | 0(0.0)   | 0(0.0)   | 2(1.2)    | 2(1.2)   | 0(0.0)   | 0(0.0)   | -      | -     |
|                     | Levofloxacin                  | 0(0.0)   | 0(0.0)   | 0(0.0)    | 2(1.2)   | 0(0.0)   | 0(0.0)   | 0.034  | 0.805 |
|                     | Carbapenems                   | 12(8.5)  | 53(24.8) | 4(2.5)    | 25(11.2) | 7(7.1)   | 18(15.9) | -0.211 | 0.924 |
| <i>A.baumannii</i>  | Ampicillin/sulbactam          | 54(38.0) | 43(31.2) | 111(51.2) | 60(50.4) | 15(38.5) | 22(40.7) | 0.989  | 0.649 |
|                     | Ceftazidime                   | 55(38.7) | 46(31.5) | 111(51.6) | 62(48.1) | 15(38.5) | 6(15.0)  | -2.886 | 0.416 |
|                     | Ceftriaxone                   | 56(40.0) | 43(31.2) | 111(51.6) | 60(50.4) | 14(36.8) | 13(31.7) | -0.740 | 0.769 |
|                     | Cefepime                      | 55(38.7) | 46(31.5) | 103(50.5) | 62(48.1) | /        | 19(35.8) | -      | -     |
|                     | Imipenem                      | 35(24.8) | 24(19.2) | 63(28.9)  | 39(30.2) | 15(38.5) | 22(48.9) | 5.134  | 0.012 |
|                     | Meropenem                     | /        | 23(16.7) | /         | 23(20.4) | /        | 9(18.8)  | -      | -     |
|                     | Tobramycin                    | 42(30.0) | 35(24.0) | 99(46.0)  | 46(36.2) | 2(5.1)   | 6(15.0)  | -4.043 | 0.297 |
|                     | Ciprofloxacin                 | 47(33.3) | 33(24.3) | 99(49.7)  | 57(44.2) | 5(12.8)  | 9(15.8)  | -3.643 | 0.367 |
|                     | Levofloxacin                  | 6(4.0)   | 6(4.1)   | 14(6.7)   | 23(22.8) | 5(12.8)  | 0(0.0)   | 0.634  | 0.785 |
|                     | Trimethoprim/Sulfamethoxazole | 61(42.7) | 50(36.8) | 112(52.1) | 42(41.6) | 12(30.8) | 6(15.0)  | -4.771 | 0.118 |
|                     | Carbapenems                   | 35(24.8) | 24(19.2) | 63(28.9)  | 39(30.2) | 15(38.5) | 22(48.9) | 5.134  | 0.012 |
| <i>S.pneumoniae</i> | Penicillin G                  | 1(0.3)   | 0(0.0)   | 0(0.0)    | 1(0.2)   | 0(0.0)   | 0(0.0)   | -      | -     |



|                  |                                    |           |           |           |           |          |           |        |       |
|------------------|------------------------------------|-----------|-----------|-----------|-----------|----------|-----------|--------|-------|
|                  | Gentamicin                         | 20(5.1)   | 23(5.1)   | 24(5.9)   | 23(5.8)   | 10(6.0)  | 7(2.9)    | -0.240 | 0.450 |
|                  | Rifampicin                         | 2(0.6)    | 4(0.9)    | 4(1.0)    | 3(0.9)    | 1(0.6)   | 0(0.0)    | -0.114 | 0.225 |
|                  | Ciprofloxacin                      | 14(3.7)   | 17(3.8)   | 17(4.1)   | 20(4.9)   | 6(3.6)   | 7(2.9)    | -0.109 | 0.551 |
|                  | Levofloxacin                       | 14(3.7)   | 18(3.9)   | 17(4.2)   | 20(5.0)   | 7(4.2)   | 10(4.2)   | 0.120  | 0.305 |
|                  | Moxifloxacin                       | 11(2.9)   | 13(2.8)   | 15(3.6)   | 15(3.7)   | 6(3.6)   | 7(3.0)    | 0.086  | 0.441 |
|                  | Trimethoprim/Sulfamethoxazole      | 38(9.5)   | 46(10.1)  | 40(9.9)   | 44(11.0)  | 20(11.9) | 19(7.8)   | -0.057 | 0.885 |
|                  | Clindamycin                        | 200(50.5) | 232(50.9) | 209(51.4) | 221(54.3) | 84(50.3) | 117(48.0) | -0.326 | 0.565 |
|                  | Erythrocin                         | 218(54.9) | 251(55.0) | 225(55.6) | 230(56.5) | 88(52.4) | 125(51.2) | -0.726 | 0.146 |
|                  | Linezolid                          | 0(0.0)    | 0(0.0)    | 0(0.0)    | 0(0.0)    | 0(0.0)   | 0(0.0)    | -      | -     |
|                  | Vancomycin                         | 0(0.0)    | 0(0.0)    | 0(0.0)    | 0(0.0)    | 0(0.0)   | 0(0.0)    | -      | -     |
|                  | Chloramphenicol                    | /         | 0(0.0)    | /         | /         | 0(0.0)   | 0(0.0)    | -      | -     |
|                  | Tetracycline                       | 74(18.7)  | 55(12.0)  | 58(14.2)  | 51(12.6)  | 20(11.9) | 33(13.6)  | -0.783 | 0.233 |
| <i>E.faecium</i> | Penicillin G                       | 151(98.1) | 75(98.7)  | 97(96.0)  | 110(98.2) | 42(97.7) | 35(97.2)  | -0.151 | 0.567 |
|                  | Ampicillin                         | 150(97.4) | 75(98.7)  | 101(96.2) | 110(98.2) | 42(97.7) | 35(97.2)  | -0.057 | 0.815 |
|                  | High concentration of gentamicin   | 0(0.0)    | 0(0.0)    | 0(0.0)    | 0(0.0)    | 0(0.0)   | 0(0.0)    | -      | -     |
|                  | High concentration of streptomycin | 0(0.0)    | 0(0.0)    | 0(0.0)    | 0(0.0)    | 0(0.0)   | 0(0.0)    | -      | -     |
|                  | Ciprofloxacin                      | 109(72.2) | 53(70.7)  | 87(83.7)  | 95(86.4)  | 36(83.7) | 51(89.5)  | 3.663  | 0.019 |

|                   |                  |           |          |          |          |          |          |        |       |
|-------------------|------------------|-----------|----------|----------|----------|----------|----------|--------|-------|
|                   | Levofloxacin     | 95(61.7)  | 46(61.3) | 71(70.3) | 79(70.5) | 34(79.1) | 28(60.9) | 1.417  | 0.479 |
|                   | Erythrocin       | 139(91.4) | 63(84.0) | 86(86.0) | 93(88.6) | 28(65.1) | 40(70.2) | -4.574 | 0.055 |
|                   | Nitrofurantoin   | 6(4.0)    | 4(5.3)   | 7(6.7)   | 7(6.3)   | 3(5.9)   | 2(3.5)   | -0.031 | 0.931 |
|                   | Linezolid        | 0(0.0)    | 0(0.0)   | 0(0.0)   | 0(0.0)   | 0(0.0)   | 0(0.0)   | -      | -     |
|                   | Vancomycin       | 1(0.6)    | 2(2.0)   | 0(0.0)   | 0(0.0)   | 0(0.0)   | 0(0.0)   | -      | -     |
|                   | Tetracycline     | 108(70.1) | 64(65.3) | 81(80.2) | 82(81.2) | 30(69.8) | 45(78.9) | 1.671  | 0.348 |
| <i>C.albicans</i> | Amphotericin B   | 0(0.0)    | 0(0.0)   | 0(0.0)   | 0(0.0)   | 0(0.0)   | 0(0.0)   | -      | -     |
|                   | 5-Fluorocytosine | 2(1.8)    | 3(2.6)   | 1(0.5)   | 1(1.1)   | 0(0.0)   | 1(1.6)   | -0.234 | 0.350 |
|                   | Fluconazole      | 12(10.8)  | 4(4.1)   | 3(1.5)   | 0(0.0)   | 2(2.6)   | 0(0.0)   | -1.714 | 0.061 |
|                   | Itraconazole     | 17(15.6)  | 10(9.8)  | 4(2.0)   | 0(0.0)   | 1(1.3)   | 2(2.8)   | -2.614 | 0.057 |
|                   | Voriconazole     | 0(0.0)    | 0(0.0)   | 0(0.0)   | 0(0.0)   | 0(0.0)   | 0(0.0)   | -      | -     |

Abbreviations: *E.coli*, *Escherichia coli*; *S.aureus*, *Staphylococcus aureus*; *S.pneumoniae*, *Streptococcus pneumonia*; *K.pneumonia*, *Klebsiella pneumonia*; *H.influenzae*, *Haemophilus influenza*; *C.albicans*, *Candida albicans*; *A.baumannii*, *Acinetobacter baumannii*; *E.faecium*, *Enterococcus faecium*; *E.cloacae*, *Enterobacter cloacae*; *P.aeruginosa*, *Pseudomonas aeruginosa*.

**Supplementary Table 4 The correlation between antimicrobial resistance rates and antibiotic consumption in the Specialist Children's Hospital from 2016 to 2021**

| Resistance rates                | Consumption of antimicrobial agents            | Correlation coefficient ( <i>r</i> ) | <i>P</i> |
|---------------------------------|------------------------------------------------|--------------------------------------|----------|
| <i>E.coli</i> to cefepime       | Penicillins (except for P/BLI combinations)    | 0.111                                | 0.606    |
|                                 | P/BLI combinations                             | 0.156                                | 0.466    |
|                                 | First-generation cephalosporins                | 0.079                                | 0.715    |
|                                 | Second-generation cephalosporins               | -0.22                                | 0.920    |
|                                 | Third-generation cephalosporins                | 0.114                                | 0.596    |
|                                 | Cephalosporins (except for C/BLI combinations) | 0.044                                | 0.837    |
|                                 | C/BLI combinations                             | -0.128                               | 0.550    |
|                                 | BL/BLI combinations                            | -0.124                               | 0.562    |
|                                 | Carbapenems                                    | 0.103                                | 0.633    |
|                                 | Monobactams                                    | 0.039                                | 0.857    |
|                                 | Macrolides                                     | -0.006                               | 0.977    |
|                                 | Glycopeptide antibacterials                    | 0.115                                | 0.593    |
|                                 | Oxazolidinone                                  | -0.074                               | 0.733    |
|                                 | Imidazole derivatives                          | 0.251                                | 0.238    |
|                                 | Quinolones                                     | 0.313                                | 0.137    |
|                                 | Antifungal drugs                               | 0.056                                | 0.797    |
| Sodium fusidate                 | 0.126                                          | 0.558                                |          |
| <i>E.cloacae</i> to carbapenems | Penicillins (except for P/BLI combinations)    | 0.034                                | 0.875    |
|                                 | P/BLI combinations                             | 0.115                                | 0.593    |
|                                 | First-generation cephalosporins                | 0.132                                | 0.539    |
|                                 | Second-generation cephalosporins               | -0.009                               | 0.966    |
|                                 | Third-generation cephalosporins                | 0.084                                | 0.697    |
|                                 | Cephalosporins (except for C/BLI               | 0.190                                | 0.374    |

|                                    |                                                |        |        |
|------------------------------------|------------------------------------------------|--------|--------|
|                                    | combinations)                                  |        |        |
|                                    | C/BLI combinations                             | 0.675  | <0.001 |
|                                    | BL/BLI combinations                            | 0.684  | <0.001 |
|                                    | Carbapenems                                    | 0.417  | 0.043  |
|                                    | Monobactams                                    | 0.507  | 0.011  |
|                                    | Macrolides                                     | -0.324 | 0.123  |
|                                    | Glycopeptide antibacterials                    | 0.106  | 0.623  |
|                                    | Oxazolidinone                                  | -0.252 | 0.234  |
|                                    | Imidazole derivatives                          | 0.358  | 0.086  |
|                                    | Quinolones                                     | 0.175  | 0.413  |
|                                    | Antifungal drugs                               | -0.100 | 0.642  |
|                                    | Sodium fusidate                                | -0.136 | 0.527  |
| <i>P.aeruginosa</i> to ceftazidime | Penicillins (except for P/BLI combinations)    | 0.126  | 0.557  |
|                                    | P/BLI combinations                             | 0.215  | 0.313  |
|                                    | First-generation cephalosporins                | 0.320  | 0.127  |
|                                    | Second-generation cephalosporins               | -0.220 | 0.302  |
|                                    | Third-generation cephalosporins                | 0.281  | 0.183  |
|                                    | Cephalosporins (except for C/BLI combinations) | 0.367  | 0.078  |
|                                    | C/BLI combinations                             | 0.625  | 0.001  |
|                                    | BL/BLI combinations                            | 0.632  | 0.001  |
|                                    | Carbapenems                                    | 0.753  | <0.001 |
|                                    | Monobactams                                    | 0.227  | 0.285  |
|                                    | Macrolides                                     | -0.138 | 0.520  |
|                                    | Glycopeptide antibacterials                    | 0.237  | 0.265  |
|                                    | Oxazolidinone                                  | -0.160 | 0.454  |
|                                    | Imidazole derivatives                          | -0.239 | 0.260  |
|                                    | Quinolones                                     | 0.186  | 0.385  |
|                                    | Antifungal drugs                               | -0.354 | 0.090  |



|                                    |                                                |        |        |
|------------------------------------|------------------------------------------------|--------|--------|
|                                    | Sodium fusidate                                | -0.100 | 0.642  |
| <i>A.baumannii</i> to carbapenems  | Penicillins (except for P/BLI combinations)    | 0.012  | 0.955  |
|                                    | P/BLI combinations                             | 0.248  | 0.243  |
|                                    | First-generation cephalosporins                | 0.293  | 0.165  |
|                                    | Second-generation cephalosporins               | -0.123 | 0.568  |
|                                    | Third-generation cephalosporins                | 0.357  | 0.087  |
|                                    | Cephalosporins (except for C/BLI combinations) | 0.401  | 0.053  |
|                                    | C/BLI combinations                             | 0.763  | <0.001 |
|                                    | BL/BLI combinations                            | 0.770  | <0.001 |
|                                    | Carbapenems                                    | 0.806  | <0.001 |
|                                    | Monobactams                                    | 0.557  | 0.005  |
|                                    | Macrolides                                     | -0.391 | 0.059  |
|                                    | Glycopeptide antibacterials                    | 0.176  | 0.412  |
|                                    | Oxazolidinone                                  | -0.272 | 0.198  |
|                                    | Imidazole derivatives                          | -0.065 | 0.762  |
|                                    | Quinolones                                     | 0.382  | 0.066  |
|                                    | Antifungal drugs                               | -0.309 | 0.142  |
| Sodium fusidate                    | -0.351                                         | 0.092  |        |
| <i>S.pneumoniae</i> to ceftriaxone | Penicillins (except for P/BLI combinations)    | -0.074 | 0.730  |
|                                    | P/BLI combinations                             | 0.045  | 0.834  |
|                                    | First-generation cephalosporins                | 0.207  | 0.333  |
|                                    | Second-generation cephalosporins               | -0.064 | 0.765  |
|                                    | Third-generation cephalosporins                | 0.036  | 0.867  |
|                                    | Cephalosporins (except for C/BLI combinations) | 0.109  | 0.613  |
|                                    | C/BLI combinations                             | 0.323  | 0.124  |
|                                    | BL/BLI combinations                            | 0.323  | 0.124  |

|                                   |                                                |        |       |
|-----------------------------------|------------------------------------------------|--------|-------|
|                                   | Carbapenems                                    | 0.197  | 0.357 |
|                                   | Monobactams                                    | 0.142  | 0.509 |
|                                   | Macrolides                                     | 0.040  | 0.851 |
|                                   | Glycopeptide antibacterials                    | 0.037  | 0.862 |
|                                   | Oxazolidinone                                  | -0.217 | 0.308 |
|                                   | Imidazole derivatives                          | -0.064 | 0.765 |
|                                   | Quinolones                                     | -0.038 | 0.859 |
|                                   | Antifungal drugs                               | -0.193 | 0.366 |
|                                   | Sodium fusidate                                | 0.037  | 0.864 |
| <i>E.faecium</i> to ciprofloxacin | Penicillins (except for P/BLI combinations)    | 0.337  | 0.108 |
|                                   | P/BLI combinations                             | 0.276  | 0.191 |
|                                   | First-generation cephalosporins                | 0.221  | 0.299 |
|                                   | Second-generation cephalosporins               | -0.107 | 0.620 |
|                                   | Third-generation cephalosporins                | 0.293  | 0.165 |
|                                   | Cephalosporins (except for C/BLI combinations) | 0.324  | 0.123 |
|                                   | C/BLI combinations                             | 0.325  | 0.122 |
|                                   | BL/BLI combinations                            | 0.337  | 0.108 |
|                                   | Carbapenems                                    | 0.174  | 0.417 |
|                                   | Monobactams                                    | 0.067  | 0.754 |
|                                   | Macrolides                                     | -0.225 | 0.290 |
|                                   | Glycopeptide antibacterials                    | 0.116  | 0.589 |
|                                   | Oxazolidinone                                  | -0.007 | 0.976 |
|                                   | Imidazole derivatives                          | 0.040  | 0.853 |
|                                   | Quinolones                                     | 0.373  | 0.073 |
|                                   | Antifungal drugs                               | 0.228  | 0.285 |
|                                   | Sodium fusidate                                | -0.230 | 0.280 |

Abbreviations: BL/BLI,  $\beta$ -lactam/ $\beta$ -lactamase inhibitor; C/BLI, cephalosporin/ $\beta$ -lactamase inhibitor; P/BLI, penicillin/ $\beta$ -Lactamase inhibitor; DDDs, defined daily doses; *E.coli*, *Escherichia coli*; *S.pneumoniae*, *Streptococcus pneumonia*; *A.baumannii*, *Acinetobacter baumannii*; *E.faecium*, *Enterococcus faecium*; *E.cloacae*, *Enterobacter cloacae*; *P.aeruginosa*, *Pseudomonas aeruginosa*.
